# Supplementary material
Source: publisher figshare collection journal article supplement (https://springernature.figshare.com/ndownloader/files/18096356)
Supplement: Supplementary file 1 [file 18096356]

**Okuyama et al. Application of a computer vision technique to animal-borne video data: Extraction of head movement to understand sea turtles’ visual assessment of surroundings**

**ADDITIONAL FILES**


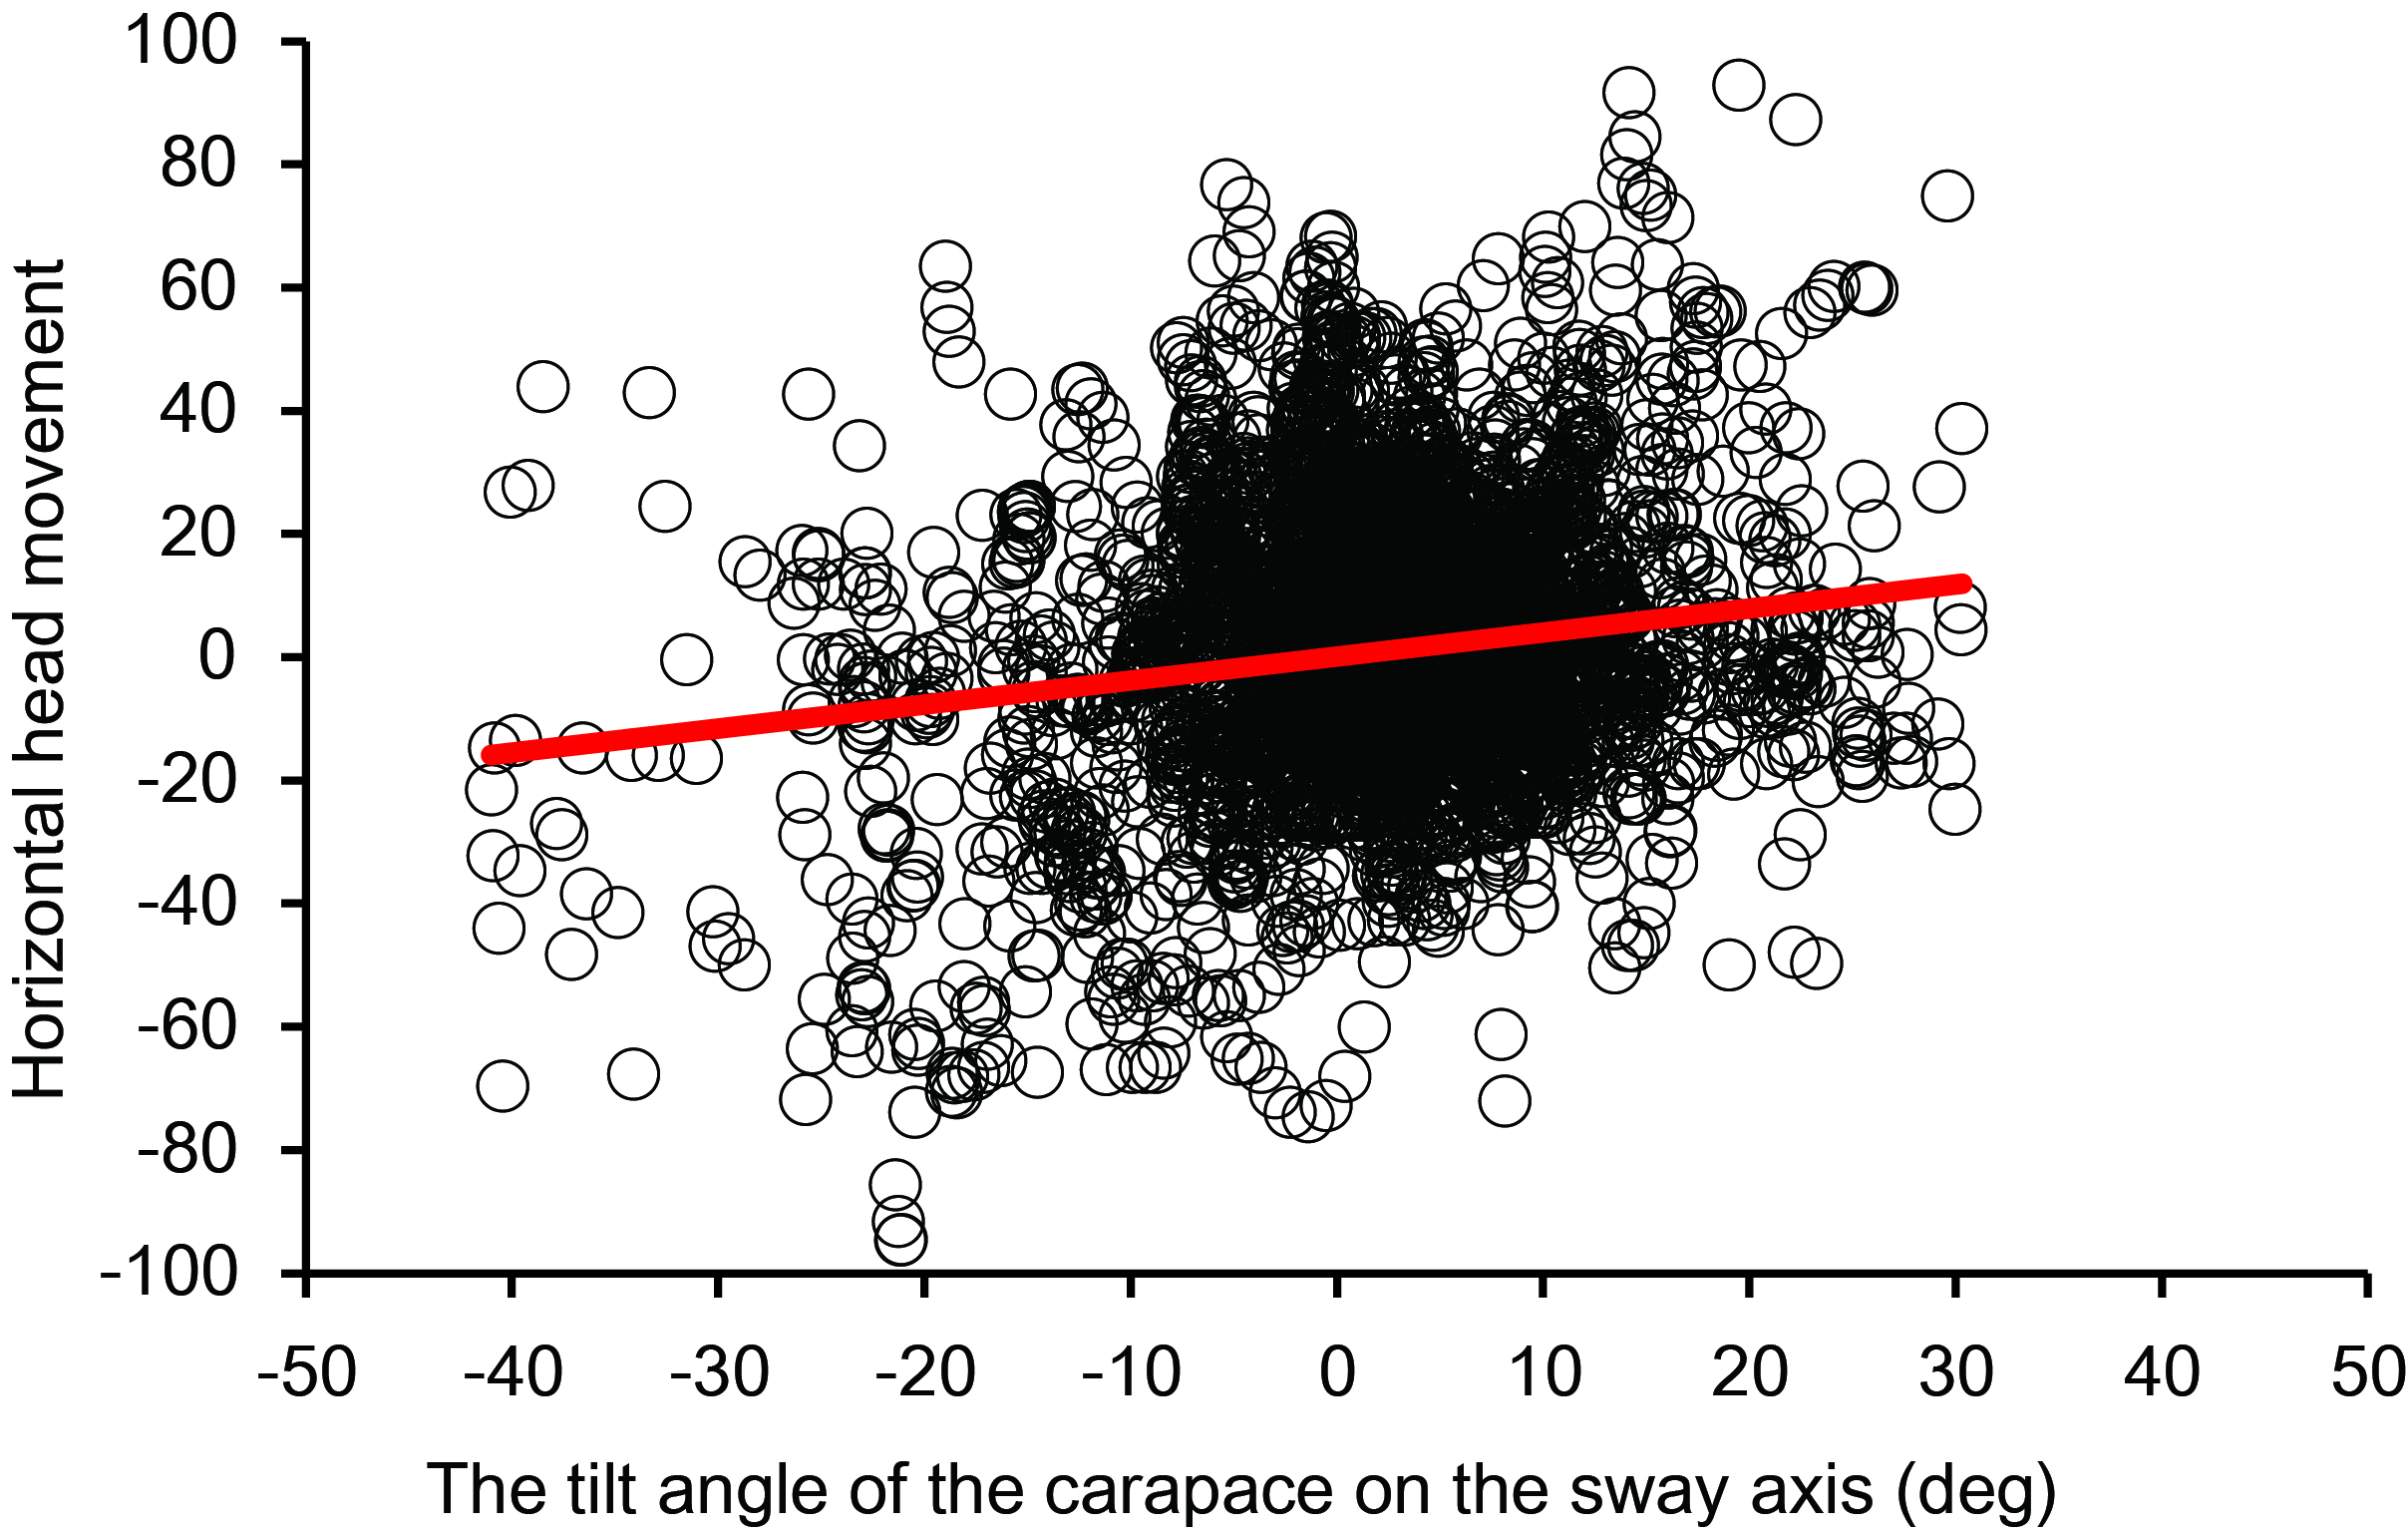


**Additional file 2**. The relationship between the carapace tilt angle on the sway (lateral) axis and horizontal head position. A significant relationship (*y* = 0.39*x* + 0.91, *R2* = 0.13, *N* = 16915, *F* = 292, *P* < 0.01) indicates that turtles tended to move their heads to the side in which they were tilted.
